# Supplementary material for: Cannabis-based product use in a multiple sclerosis cohort
Source: PubMed Central journal article supplement — Mult Scler J Exp Transl Clin. 2019 Sep 25;5(3):2055217319869360. doi: 10.1177/2055217319869360 (PMC6764052; doi:10.1177/2055217319869360), 2019-09-25
Supplement: MSO869360_Supplemental_Material.pdf [file MSO869360_Supplemental_Material.pdf]

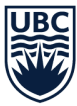

## Cannabinoid use in multiple sclerosis; a survey of patients at the University of British Columbia Multiple Sclerosis Clinic

Please only complete this survey ONE time

### General Patient Information

#### Gender

- ☐ Male ☐ Female ☐ Unspecified

#### Age

- ☐ 18-25 years ☐ 25-35 years ☐ 35-45 years  
☐ 45-55 years ☐ 55-65 years ☐ > 65 years

#### Employment Status?

- ☐ Full Time ☐ Part Time ☐ Stay at home parent/caregiver ☐ Unemployed/Disability

### Illness information

#### Disease course?

- ☐ Relapsing MS ☐ Primary Progressive MS ☐ Secondary Progressive MS  
☐ Clinically Isolated Syndrome ☐ Diagnosis other than MS ☐ Not sure

#### Time since FIRST symptom related to MS?

- ☐ < 1 year ☐ 1-5 years ☐ 5-10 years ☐ >10 years

#### Have you EVER taken? (check all that apply)?

- ☐ Avonex, Betaseron, Rebif (Interferons 1a/b) ☐ Copaxone (Glatiramer Acetate) ☐ Aubagio (Teriflunimide)  
☐ Tecfidera (Dimethyl Fumarate) ☐ Tysabri (Natalizumab) ☐ Gilenya (Fingolimod)  
☐ Rituximab/Ocrelizumab ☐ Lemtrada (Alemtuzumba)

#### Are you CURRENTLY taking any of the following (check all the apply)?

- ☐ Interferons (Avonex, Betaseron, Rebif) ☐ Copaxone (Glatiramer Acetate) ☐ Aubagio (Teriflunimide)  
☐ Tecfidera (Dimethyl Fumarate) ☐ Tysabri (Natalizumab) ☐ Gilenya (Fingolimod)  
☐ Rituximab/Ocrelizumab ☐ Lemtrada (Alemtuzumba)

---

Have you used any of the following for symptomatic management (check all that apply)?

|             |                                                |                                                      |                                     |                                |
|-------------|------------------------------------------------|------------------------------------------------------|-------------------------------------|--------------------------------|
| Bladder:    | <input type="checkbox"/> Oxybutynin (Ditropan) | <input type="checkbox"/> Mirabegron (Myrbetriq)      | <input type="checkbox"/> Botox      | <input type="checkbox"/> Other |
| Cognition:  | <input type="checkbox"/> Modafinil (Alertec)   | <input type="checkbox"/> Vyvanse                     | <input type="checkbox"/> Amantidine | <input type="checkbox"/> Other |
| Spasticity: | <input type="checkbox"/> Baclofen              | <input type="checkbox"/> Botox                       | <input type="checkbox"/> Tizanidine | <input type="checkbox"/> Other |
| Pain:       | <input type="checkbox"/> Gabapentin/Lyrica     | <input type="checkbox"/> Amitriptyline/Nortriptyline | <input type="checkbox"/> Cymbalta   | <input type="checkbox"/> Other |

### Patient Perceived Disability Scale (NARCOMS)

---

Please select one of the following that you feel best describes your disability level?

- ☐ **0 Normal:** I may have some mild symptoms, mostly sensory, due to MS, but they do not limit my activity. If I do have an attack, I return to normal when the attack has passed.
- ☐ **1 Mild disability:** I have some noticeable symptoms from my MS, but they are minor and have only a small effect on my lifestyle.
- ☐ **2 Moderate disability:** I don't have any limitations in my walking ability. However, I do have significant problems due to MS that limit daily activities in other ways.
- ☐ **3 Gait disability:** MS does interfere with my activities, especially my walking. I can work a full day, but athletic or physically demanding activities are more difficult than they used to be. I usually don't need a cane or other assistance to walk, but I might need some assistance during an attack.
- ☐ **4 Early cane:** I use a cane or a single crutch or some other form of support (such as touching a wall or leaning on someone's arm) for walking all the time or part of the time, especially when walking outside. I think I can walk 25 feet in 20 seconds without a cane or crutch. I always need some assistance (cane or crutch) if I want to walk as far as 3 blocks.
- ☐ **5 Late cane:** To be able to walk 25 feet, I have to have a cane, crutch, or someone to hold onto. I can get around the house or other buildings by holding onto furniture or touching the walls for support. I may use a scooter or wheelchair if I want to go greater distances.
- ☐ **6 Bilateral support:** To be able to walk as far as 25 feet I must have 2 canes or crutches or a walker. I may use a scooter or wheelchair for longer distances.
- ☐ **7 Wheelchair/scooter:** My main form of mobility is a wheelchair. I may be able to stand and/or take 1 or 2 steps, but I can't walk 25 feet, even with crutches or a walker.
- ☐ **8 Bedridden:** Unable to sit in a wheelchair for more than 1 hour.

### Cannabinoid use

---

Have you used any of the following Cannabinoid products (check all that apply) for MS symptoms?

|                                       |                                        |                                  |                                           |
|---------------------------------------|----------------------------------------|----------------------------------|-------------------------------------------|
| <input type="checkbox"/> Oral/Edibles | <input type="checkbox"/> Mucosal spray | <input type="checkbox"/> Topical | <input type="checkbox"/> Smoked/Vaporized |
|---------------------------------------|----------------------------------------|----------------------------------|-------------------------------------------|

If using Cannabinoid products, which ratio of CBD/THC do you commonly use?

|                                   |                                    |                                    |                                 |
|-----------------------------------|------------------------------------|------------------------------------|---------------------------------|
| <input type="checkbox"/> Pure CBD | <input type="checkbox"/> CBD > THC | <input type="checkbox"/> THC > CBD | <input type="checkbox"/> Unsure |
|-----------------------------------|------------------------------------|------------------------------------|---------------------------------|

How often do you use Cannabinoid products?

|                                |                                 |                                  |                                 |                                |
|--------------------------------|---------------------------------|----------------------------------|---------------------------------|--------------------------------|
| <input type="checkbox"/> Daily | <input type="checkbox"/> Weekly | <input type="checkbox"/> Monthly | <input type="checkbox"/> Rarely | <input type="checkbox"/> Never |
|--------------------------------|---------------------------------|----------------------------------|---------------------------------|--------------------------------|

---

How long have you been using Cannabinoid products?

☐ <1 year      ☐ 1-2 years      ☐ 2-5 years      ☐ 5-10 years      ☐ > 10 years

---

Which symptoms did you INITIALLY start taking Cannabinoid products to help (check all that apply)?

☐ Pain                                      ☐ Spasticity                                      ☐ Sleep                                      ☐ Mood  
☐ Tremor                                      ☐ Urinary Incontinency                                      ☐ Urinary Urgency                                      ☐ Other

---

Did you experience improvement in the symptoms that led you to start taking Cannabinoid products?

☐ Yes | ☐ No

---

Overall perceived benefits (check all that apply):

☐ Pain                                      ☐ Spasticity                                      ☐ Sleep                                      ☐ Mood  
☐ Tremor                                      ☐ Urinary Incontinency                                      ☐ Urinary Urgency                                      ☐ Other

---

Perceived side effects?

☐ Worsening memory                                      ☐ Increased brain fog                                      ☐ Disrupted sleep  
☐ Mood dysregulation                                      ☐ Psychosis                                      ☐ Other

---

Were the Cannabinoid products prescribed by your MS physician?

☐ Yes | ☐ No

---

Did you discuss your Cannabinoid product use with your MS Physician?

☐ Yes | ☐ No

---

Did you regularly use cannabinoid products regularly before your diagnosis of MS?

☐ Yes | ☐ No
